# Supplementary material for: OH, HO 2 , and RO 2 radical chemistry in a rural forest environment: measurements, model comparisons, and evidence of a missing radical sink
Source: Copernicus journal article supplement (doi:10.5194/acp-23-10287-2023), 2023-09-15
Supplement: Supplementary file 1 [file acp-23-10287-2023-supplement.pdf]

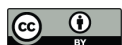

*Supplement of*

## **OH, HO<sub>2</sub>, and RO<sub>2</sub> radical chemistry in a rural forest environment: measurements, model comparisons, and evidence of a missing radical sink**

**Brandon Bottorff et al.**

*Correspondence to:* Brandon Bottorff (brabott@indiana.edu) and Philip S. Stevens (pstevens@indiana.edu)

The copyright of individual parts of the supplement might differ from the article licence.

**Text S1:** In order to determine the relative accuracy of the LIF and ECHAMP radical measurements, on July 25<sup>th</sup> the ECHAMP sampled from the IU calibration source. For this comparison, isoprene was added to the humidified air, producing 50% HO<sub>2</sub> and 50% isoprene-RO<sub>2</sub>. Two data points were collected: 1: Calibration source = 335 ppt HO<sub>2</sub> + isoprene RO<sub>2</sub>, RH = 33%, ECHAMP measured 326 ppt, 2. Calibration source = 314 ppt HO<sub>2</sub> + isoprene RO<sub>2</sub>, RH = 31%, ECHAMP measured 309 ppt.

- 5 One reason for this excellent agreement (within 3%) is that the largest source of uncertainty for the calibration gas concentration - the product of the UV lamp actinic flux and the irradiation time (“Ft”) - was tied to readings from ECHAMP as it was determined by the measurement of O<sub>3</sub> in the ECHAMP background channel when sampling dry zero air (Kundu et al., 2019). The Licor 6262 H<sub>2</sub>O measurements used for the IU calibration source also agreed with the water vapor mixing ratios determined using the ECHAMP RH/T probe within 5%.

10

**Table S1: Measured compounds used as model constraints within RACM and respective measurement sources (CU: University of Colorado, UH: University of Houston, NE: IMT Nord Europe, UM: University of Minnesota, HU: Harvard University, NCAR: National Center for Atmospheric Research, SUNY: University at Albany)**

| <b>RACM2 input</b> | <b>Grouped compounds</b>                                   | <b>Source</b> | <b>RACM2 input</b> | <b>Grouped compounds</b>     | <b>Source</b> |
|--------------------|------------------------------------------------------------|---------------|--------------------|------------------------------|---------------|
| H2                 | hydrogen                                                   | Calc.         | NO                 | nitrous oxide                | NCAR          |
| O3                 | ozone                                                      | CU            | NO2                | nitric oxide                 | NCAR          |
| CO                 | carbon monoxide                                            | UH            | HONO               | nitrous acid                 | SUNY          |
| SO2                | sulfur dioxide                                             | UH            | ISO                | isoprene                     | UM            |
| H2O                | water vapor                                                | UH            | MVK                | methylvinylketone            | UM            |
| CH4                | methane                                                    | Calc.         | MACR               | methacrolein                 | UM/NE         |
| ETH                | ethane                                                     | NE            | API                | monoterpenes                 | UM            |
| HC3                | propane, n-butane, isobutane                               | NE            | BALD               | benzaldehyde                 | UM            |
|                    | isopentane, n-pentane, n-heptane,                          |               | ACD                | acetaldehyde                 | UM            |
| HC5                | dimethylbutane, 2-methylpentane, 3-methylpentane, n-hexane | NE            | ACT                | acetone                      | UM            |
|                    |                                                            |               | HCHO               | formaldehyde                 | HU/NE         |
|                    |                                                            |               | ALD                | propanal, butanal            | NE            |
|                    |                                                            |               | GLY                | glyoxal                      | NE            |
| HC8                | ethyne, nonane                                             | NE            | MGLY               | methylglyoxal                | NE            |
| ETE                | ethene                                                     | NE            | BEN                | benzene                      | UM            |
| OLI                | trans-2-butene                                             | NE            |                    | toluene,                     |               |
| OLT                | propene, 1-butene                                          | NE            | TOL                | ethylbenzene, 2-ethyltoluene | UM/NE         |
| DIEN               | butadiene                                                  | NE            | XYP/XYM            | m,p-xylene                   | NE            |
| MEK                | methylethylketone                                          | NE            | XYO                | o-xylene                     | NE            |

Table S2: Model constraints, their designation within MCM, and respective measurement sources.

| MCM Designation                                 | Measured Constraint      | MCM Designation                   | Measured Constraint |
|-------------------------------------------------|--------------------------|-----------------------------------|---------------------|
| <b>University of Houston</b>                    |                          | <b>IMT Nord Europe</b>            |                     |
| T                                               | temperature              | HCHO                              | formaldehyde        |
| RH                                              | relative humidity        | C2H2                              | ethyne              |
| P                                               | pressure                 | C2H4                              | ethene              |
| j(NO <sub>2</sub> )                             | photolysis rate constant | C2H6                              | ethane              |
| SO <sub>2</sub>                                 | sulfur dioxide           | C3H6                              | propene             |
| CO                                              | carbon monoxide          | C3H8                              | propane             |
| <b>University of Colorado</b>                   |                          | NC4H10                            | n-butane            |
| O <sub>3</sub>                                  | ozone                    | IC4H10                            | isobutane           |
| <b>National Center for Atmospheric Research</b> |                          | BUT1ENE                           | 1-butene            |
| NO                                              | nitric oxide             | TBUT2ENE                          | trans-2-butene      |
| NO <sub>2</sub>                                 | nitrogen dioxide         | C4H6                              | 1,3-butadiene       |
| <b>University of Minnesota</b>                  |                          | M22C4                             | 2,2-dimethylbutane  |
| C <sub>5</sub> H <sub>8</sub>                   | isoprene                 | M3PE                              | 3-methylpentane     |
| APINENE                                         | monoterpenes             | M2PE                              | 2-methylpentane     |
| CH <sub>3</sub> CHO                             | acetaldehyde             | NC5H <sub>12</sub>                | n-pentane           |
| CH <sub>3</sub> COCH <sub>3</sub>               | acetone                  | IC5H <sub>12</sub>                | isopentane          |
| BENZENE                                         | benzene                  | NC6H <sub>14</sub>                | hexane              |
| CH <sub>3</sub> OH                              | methanol                 | NC7H <sub>17</sub>                | n-heptane           |
| TOLUENE                                         | toluene                  | NC9H <sub>20</sub>                | nonane              |
| MVK                                             | methyl vinyl ketone      | MEK                               | methyl ethyl ketone |
| MACR                                            | methacrolein             | MGLYOX                            | methylglyoxal       |
| <b>Harvard University</b>                       |                          | C <sub>2</sub> H <sub>5</sub> CHO | propanal            |
| HCHO                                            | formaldehyde             | C <sub>3</sub> H <sub>7</sub> CHO | butanal             |
| <b>SUNY</b>                                     |                          | BENZAL                            | benzaldehyde        |
| HONO                                            | nitrous acid             | EBENZ                             | ethylbenzene        |
|                                                 |                          | TM135B                            | mesitylene          |
|                                                 |                          | OETHTOL                           | 2-ethyltoluene      |
|                                                 |                          | OXYL                              | o-xylene            |
|                                                 |                          | MXYL                              | m-xylenes           |
|                                                 |                          | STYRENE                           | styrene             |

**Table S3: Summary of measurements (range of daily maximum or maximum diurnal average) of OH, HO<sub>2</sub>, XO<sub>2</sub>, isoprene, temperature, ozone, and NO<sub>x</sub> from previous field campaigns at the PROPHET site.**

| Campaign<br>(reference)                                             | Dates               | [OH]<br>(cm <sup>-3</sup> )                                     | HO <sub>2</sub><br>(ppt)                        | XO <sub>2</sub><br>(ppt) | Isoprene<br>(ppb) | MTs<br>(ppb)  | Temp.<br>(C) | O <sub>3</sub><br>(ppb) | NO <sub>x</sub><br>(ppb) |
|---------------------------------------------------------------------|---------------------|-----------------------------------------------------------------|-------------------------------------------------|--------------------------|-------------------|---------------|--------------|-------------------------|--------------------------|
| PROPHET 1997<br>(Mihele and Hastie, 2003)<br>(Sillman et al., 2002) | Jul. 29–<br>Aug. 14 | -----                                                           | -----                                           | 20-65                    | ~2–6              | ---           | ----         | ~20-<br>80              | ~0.2–<br>1.8             |
| PROPHET 1998<br>(Tan et al., 2001)                                  | Aug. 4–<br>14       | 4 × 10 <sup>6</sup><br>(Potential<br>interference) <sup>a</sup> | 18 (HO <sub>2</sub> <sup>*</sup> ) <sup>b</sup> | -----                    | 2.5               | 0.04–<br>0.40 | 28           | 46                      | 1.1                      |
| PROPHET 2008<br>(Griffith et al., 2013)                             | Jul. 8–27           | 3 × 10 <sup>6</sup><br>(Potential<br>interference) <sup>a</sup> | 20 (HO <sub>2</sub> <sup>*</sup> ) <sup>b</sup> | -----                    | 2.3               | 0.25          | 24           | 33                      | 2.1                      |
| CABINEX 2009<br>(Griffith et al. 2013)                              | Jul. 21–<br>Aug. 9  | 1.5 × 10 <sup>6</sup><br>(No observed<br>interference)          | 18 (HO <sub>2</sub> <sup>*</sup> ) <sup>b</sup> | -----                    | 1.5               | 0.25          | 20           | 35                      | 0.8                      |
| PROPHET 2016<br>(This work)                                         | Jul. 1–31           | 1.3 × 10 <sup>6</sup><br>(No observed<br>interference)          | 14                                              | 30                       | 2.9               | 0.30          | 24           | 38                      | 0.8                      |

<sup>a</sup> OH measurements in 1998 and 2008 may have been influenced by unknown interferences similar to Mao et al. (2012), Feiner et al. (2016), and Lew et al. (2020).

<sup>b</sup> For campaigns in 1998, 2008, and 2009 higher concentrations of NO were added to the LIF detection cell, leading to the detection of both HO<sub>2</sub> and a fraction of RO<sub>2</sub> radicals, denoted as HO<sub>2</sub><sup>\*</sup> (HO<sub>2</sub><sup>\*</sup> = HO<sub>2</sub> + αRO<sub>2</sub>, 0 < α < 1).

15

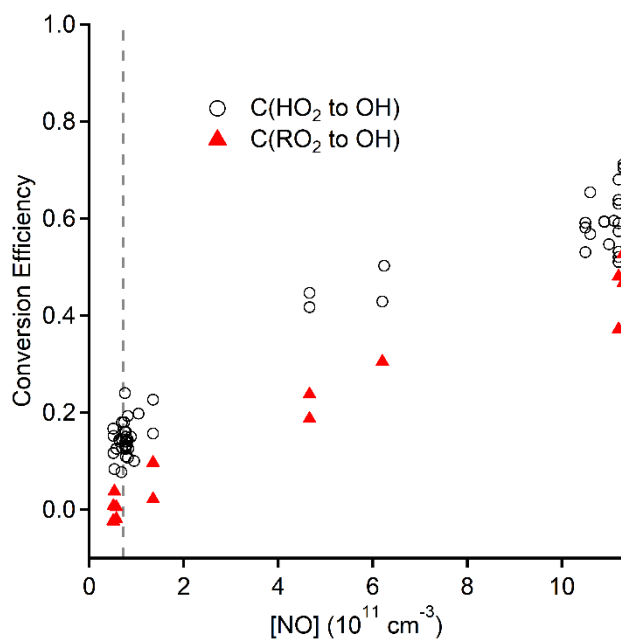

**Figure S1: Conversion efficiencies of HO<sub>2</sub> to OH (black open circles) and isoprene RO<sub>2</sub> to OH (red triangles) as a function of the NO concentration inside the sampling cell. The measured values were obtained from calibrations performed before and during the campaign. The vertical dashed line indicates the NO concentration used for HO<sub>2</sub> measurements.**

20

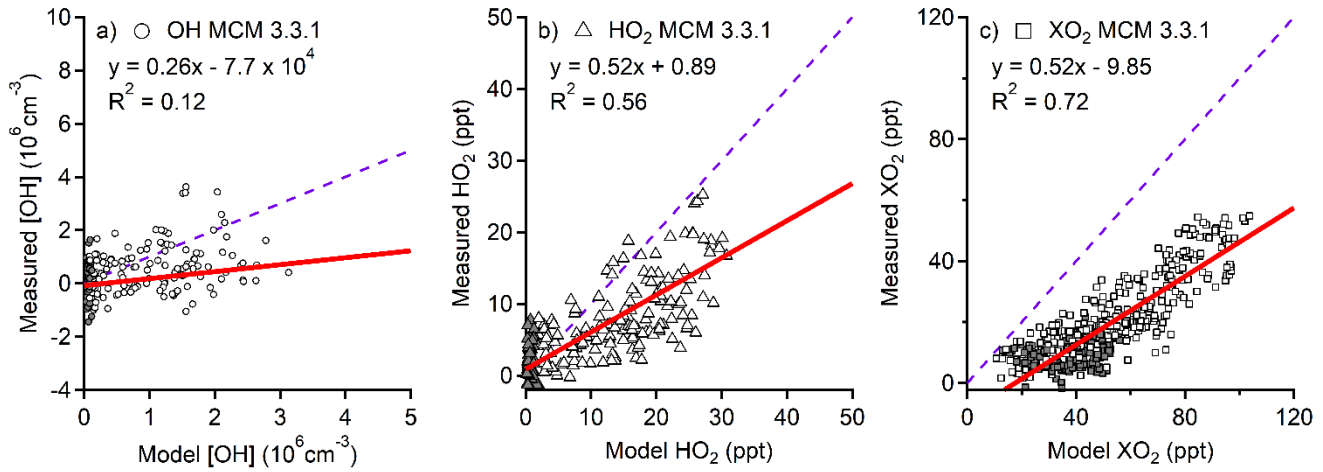

25 **Figure S2: Correlation plots of modeled radical concentrations (MCM v3.3.1) against measurements of a) OH (circles), b) HO<sub>2</sub> (triangles), and c) XO<sub>2</sub> (squares). Filled symbols denote nighttime and open symbols indicate measurements made during the day. The dashed purple line indicates a 1:1 correlation and the red lines show measurement vs. model regressions of the data weighted by both the precision of the measurements and the uncertainty of the model concentrations.**

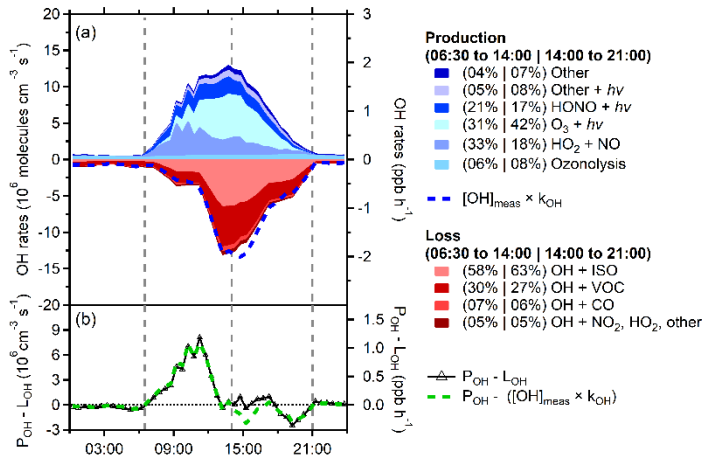

30 **Figure S3: Experimental OH radical budget. In panel (a), shades of blue represent reactions that produce OH, and shades of red represent loss rates, including reactions that propagate to RO<sub>2</sub> or HO<sub>2</sub>. Percentages indicate the relative contribution of each respective process in the morning (06:30 to 14:00) and during the evening (14:00 to 21:00) time periods which are indicated by the vertical dashed lines. The blue dashed line represents the total OH loss rate calculated from measured concentrations of OH and the measured OH reactivity. The net rate of production or loss is shown in panel (b).**

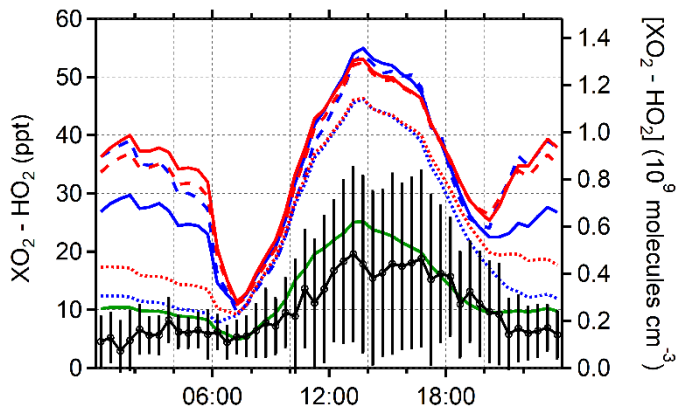

35 **Figure S4: Diurnal average measured (black) and modeled concentrations of RO<sub>2</sub>. MCM models are shown in red and RACM2 in blue. The green line represents an additional version of the RACM-ACC model with added sinks for HO<sub>2</sub> and isoprene peroxy radicals. The measured RO<sub>2</sub> mixing ratios were determined by subtracting the measured HO<sub>2</sub> (LIF) from the measured XO<sub>2</sub> (ECHAMP).**

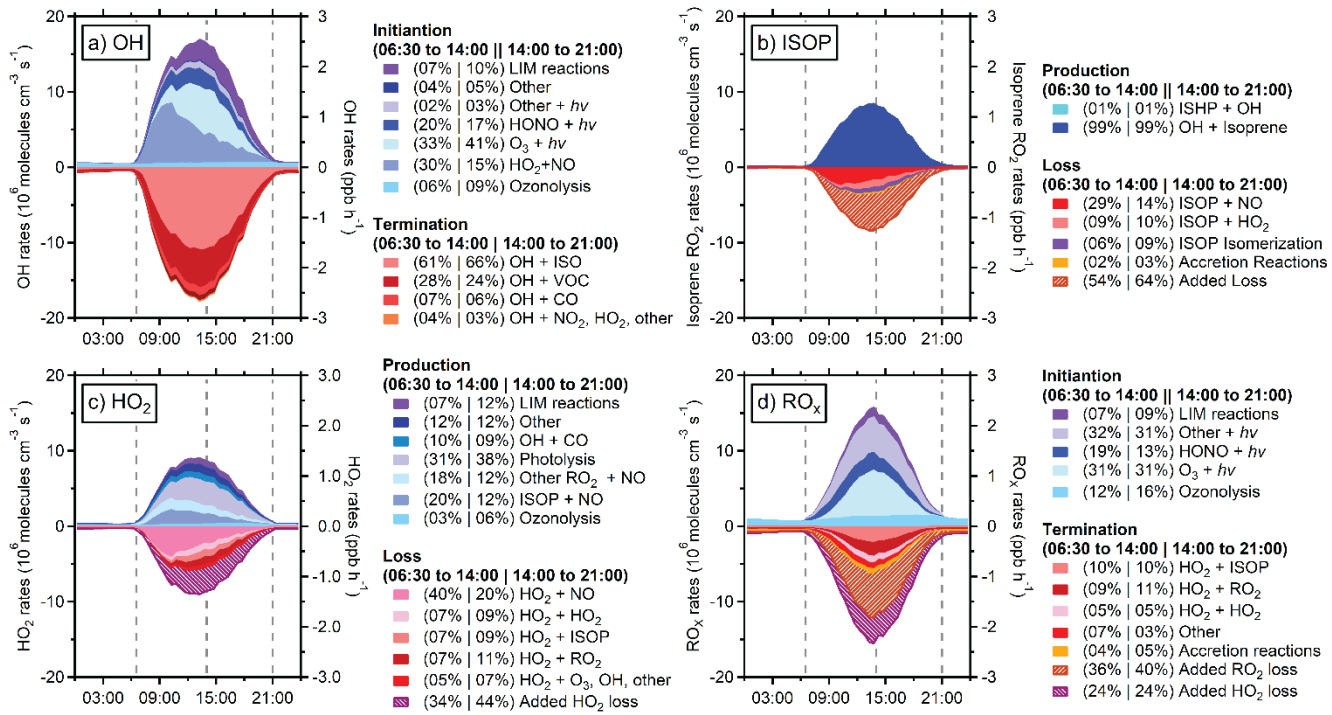

40

**Figure S5: Radical budgets for a) OH, b)  $HO_2$ , c) isoprene- $RO_2$ , and d) total  $RO_x$  from the RACM-ACC model with added loss mechanisms for  $HO_2$  and isoprene  $RO_2$ . Shades of blue represent reactions that produce OH, and shades of red represent loss rates, including reactions that propagate to  $RO_2$  or  $HO_2$ . Percentages represent the relative initiation or termination rates of each respective process in the morning (06:30 to 14:00) and during the evening (14:00 to 21:00) which are indicated by the vertical dashed lines.**

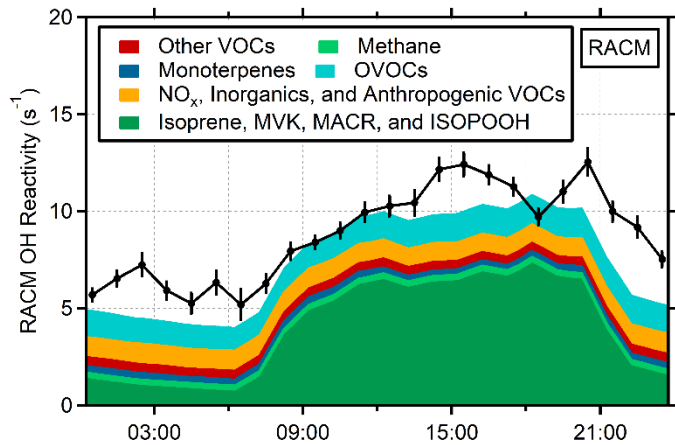

45

**Figure S6: Diurnal average of the measured (IU-TOHLM instrument) and modeled total OH reactivity at the top of the tower during PROPHET-AMOS. Modeled reactivity is largely based on measured species that are used as constraints in the RACM2-LIM1 model.**

## References

- 50 Feiner, P. A., Brune, W. H., Miller, D. O., Zhang, L., Cohen, R. C., Romer, P. S., Goldstein, A. H., Keutsch, F. N., Skog, K. M., Wennberg, P. O., Nguyen, T. B., Teng, A. P., DeGouw, J., Koss, A., Wild, R. J., Brown, S. S., Guenther, A., Edgerton, E., Baumann, K., and Fry, J. L.: Testing Atmospheric Oxidation in an Alabama Forest, *J. Atmos. Sci.*, 73, 4699-4710, <https://doi.org/10.1175/JAS-D-16-0044.1>, 2016.
- 55 Griffith, S. M., Hansen, R. F., Dusanter, S., Stevens, P. S., Alaghmand, M., Bertman, S. B., Carroll, M. A., Erickson, M., Galloway, M., Grossberg, N., Hottle, J., Hou, J., Jobson, B. T., Kamrath, A., Keutsch, F. N., Lefer, B. L., Mielke, L. H., O'Brien, A., Shepson, P. B., Thurlow, M., Wallace, W., Zhang, N., and Zhou, X. L.: OH and HO<sub>2</sub> radical chemistry during PROPHET 2008 and CABINEX 2009 - Part 1: Measurements and model comparison, *Atmos. Chem. Phys.*, 13, 5403-5423, <https://doi.org/10.5194/acp-13-5403-2013>, 2013.
- 60 Kundu, S., Deming, B. L., Lew, M. M., Bottorff, B. P., Rickly, P., Stevens, P. S., Dusanter, S., Sklaveniti, S., Leonardis, T., Locoge, N., and Wood, E. C.: Peroxy radical measurements by ethane – nitric oxide chemical amplification and laser-induced fluorescence during the IRRONIC field campaign in a forest in Indiana, *Atmos. Chem. Phys.*, 19, 9563-9579, <https://doi.org/10.5194/acp-19-9563-2019>, 2019.
- Lew, M. M., Rickly, P. S., Bottorff, B. P., Reidy, E., Sklaveniti, S., Léonardis, T., Locoge, N., Dusanter, S., Kundu, S., Wood, E., and Stevens, P. S.: OH and HO<sub>2</sub> radical chemistry in a midlatitude forest: measurements and model comparisons, *Atmos. Chem. Phys.*, 20, 9209-9230, <https://doi.org/10.5194/acp-20-9209-2020>, 2020.
- 65 Mao, J., Ren, X., Zhang, L., Van Duin, D. M., Cohen, R. C., Park, J. H., Goldstein, A. H., Paulot, F., Beaver, M. R., Crounse, J. D., Wennberg, P. O., DiGangi, J. P., Henry, S. B., Keutsch, F. N., Park, C., Schade, G. W., Wolfe, G. M., Thornton, J. A., and Brune, W. H.: Insights into hydroxyl measurements and atmospheric oxidation in a California forest, *Atmos. Chem. Phys.*, 12, 8009-8020, <https://doi.org/10.5194/acp-12-8009-2012>, 2012.
- 70 Mihele, C. M. and Hastie, D. R.: Radical chemistry at a forested continental site: Results from the PROPHET 1997 campaign, *J. Geophys. Res.- Atmos.*, 108, 4450, <https://doi.org/10.1029/2002JD002888>, 2003.
- Sillman, S., Carroll, M. A., Thornberry, T., Lamb, B. K., Westberg, H., Brune, W. H., Faloon, I., Tan, D., Shepson, P. B., Sumner, A. L., Hastie, D. R., Mihele, C. M., Apel, E. C., Riemer, D. D., and Zika, R. G.: Loss of isoprene and sources of nighttime OH radicals at a rural site in the United States: Results from photochemical models, *J. Geophys. Res.- Atmos.*, 107, ACH 2-1-ACH 2-14, <https://doi.org/https://doi.org/10.1029/2001JD000449>, 2002.
- 75 Tan, D., Faloon, I., Simpas, J. B., Brune, W., Shepson, P. B., Couch, T. L., Sumner, A. L., Carroll, M. A., Thornberry, T., Apel, E., Riemer, D., and Stockwell, W.: HO<sub>x</sub> budgets in a deciduous forest: Results from the PROPHET summer 1998 campaign, *J. Geophys. Res.- Atmos.*, 106, 24407-24427, <https://doi.org/10.1029/2001JD900016>, 2001.
